# Supplementary material for: Preparation and preliminary application of 5-HMF@SiO2 micro-particles
Source: Royal Society of Chemistry journal article supplement (doi:10.1039/c6ra04792k), 2016-01-01
Supplement: c6ra04792k1.pdf [file c6ra04792k1.pdf]

*Supporting Information for*

**Preparation and preliminary application of 5-HMF@SiO<sub>2</sub>  
micro-particles**

Cheng Wang<sup>+</sup>, Huaizhen He<sup>+</sup>, Yuanyuan Lin, Limin Huang, Meng Sun, Tao Zhang,  
Langchong He\*

School of Medicine, Xi'an Jiaotong University, Xi'an 710061, P. R. China.

\*E-mail: helc@mai.xjtu.edu.cn, Tel: +86-29-82655451, Fax: +86-29-82655451

**Contents**

- Figure S1. ESI-HRMS data of compound **1**
- Figure S2. <sup>1</sup>H NMR of compound **1**
- Figure S3. GC-MS data of compound **2**
- Figure S4. <sup>1</sup>H NMR of compound **2**
- Figure S5. ESI-HRMS data of compound **3** (mono-substituted)
- Figure S6. ESI-HRMS data of compound **3** (bi-substituted)
- Figure S7. ESI-HRMS data of compound **3** (tri-substituted)
- Figure S8. <sup>1</sup>H NMR of compound **3**
- Figure S9. <sup>1</sup>H NMR of compound **4**

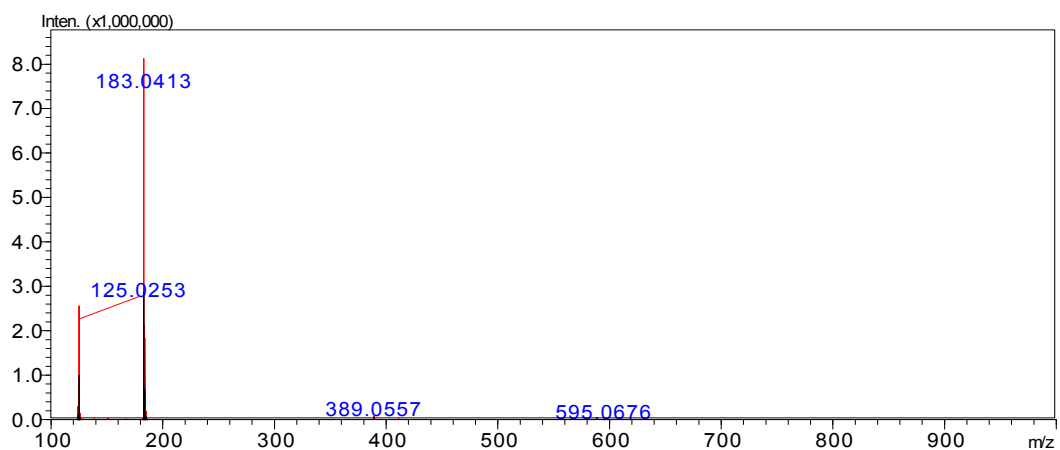

Figure S1. ESI-HRMS data of compound 1

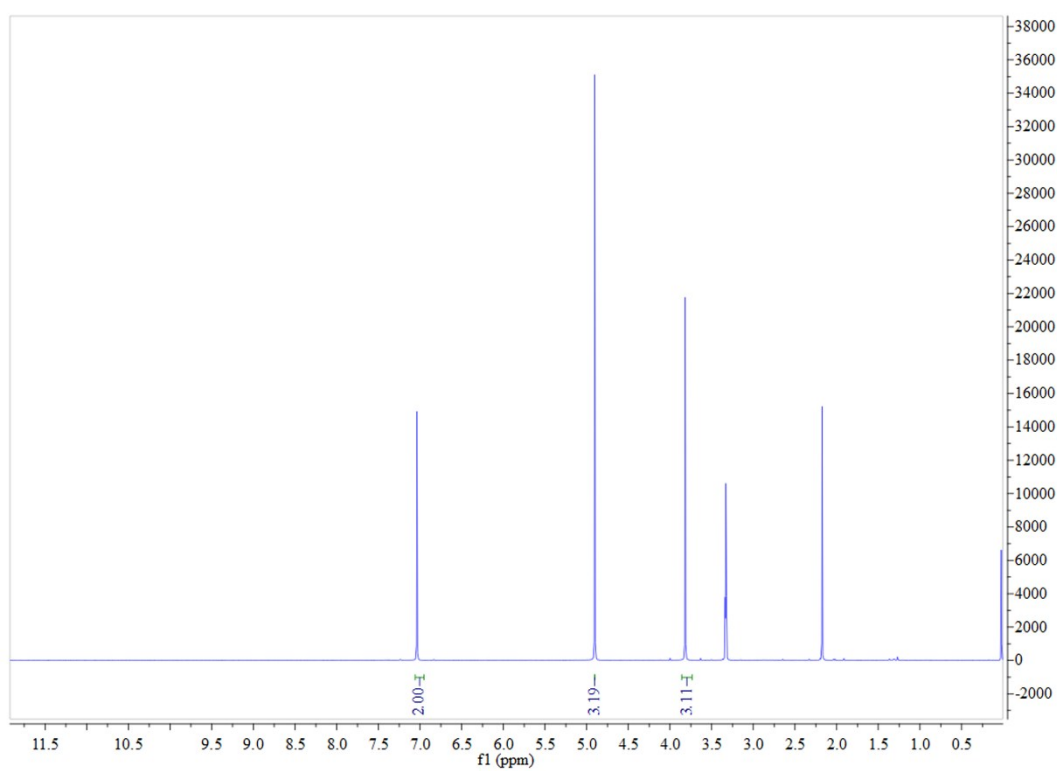

Figure S2. <sup>1</sup>H NMR of compound 1

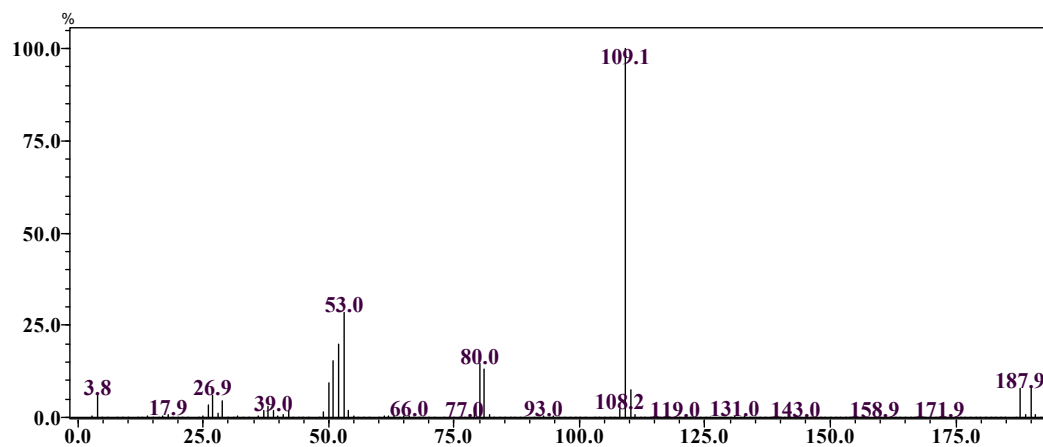

Figure S3. GC-MS data of compound 2

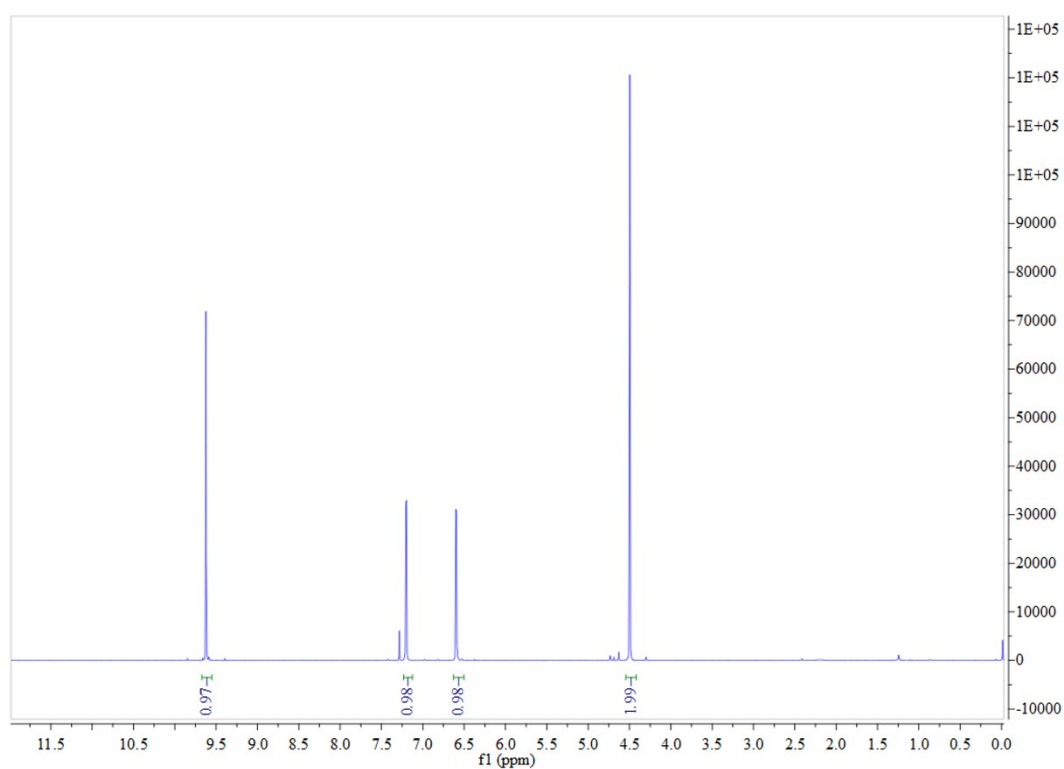

Figure S4.  $^1\text{H}$  NMR of compound 2

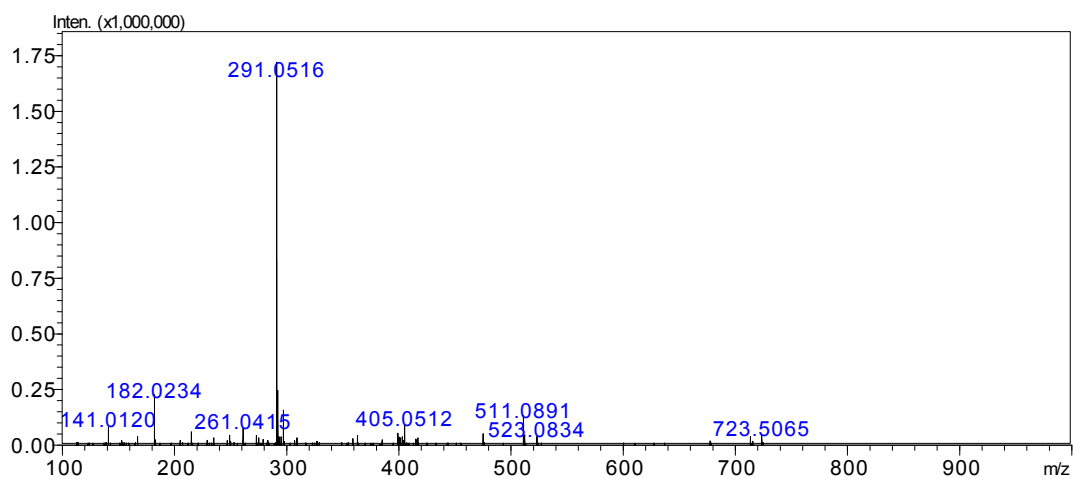

Figure S5. ESI-HRMS data of compound **3** (mono-substituted)

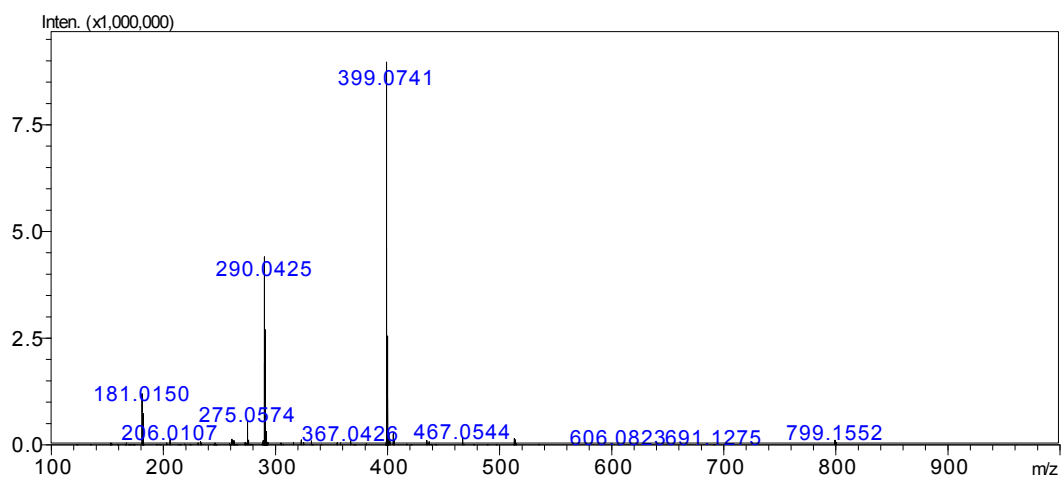

Figure S6. ESI-HRMS data of compound **3** (bi-substituted)

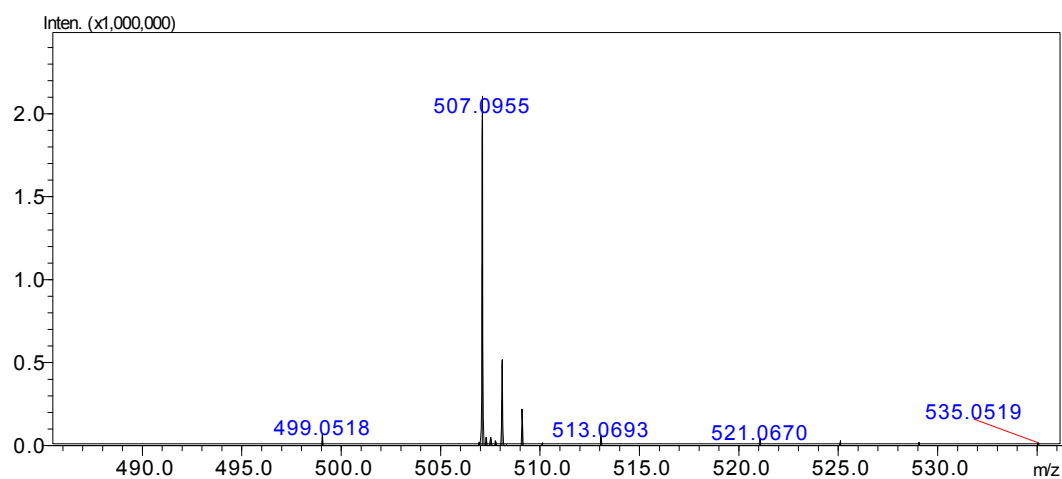

Figure S7. ESI-HRMS data of compound **3** (tri-substituted)

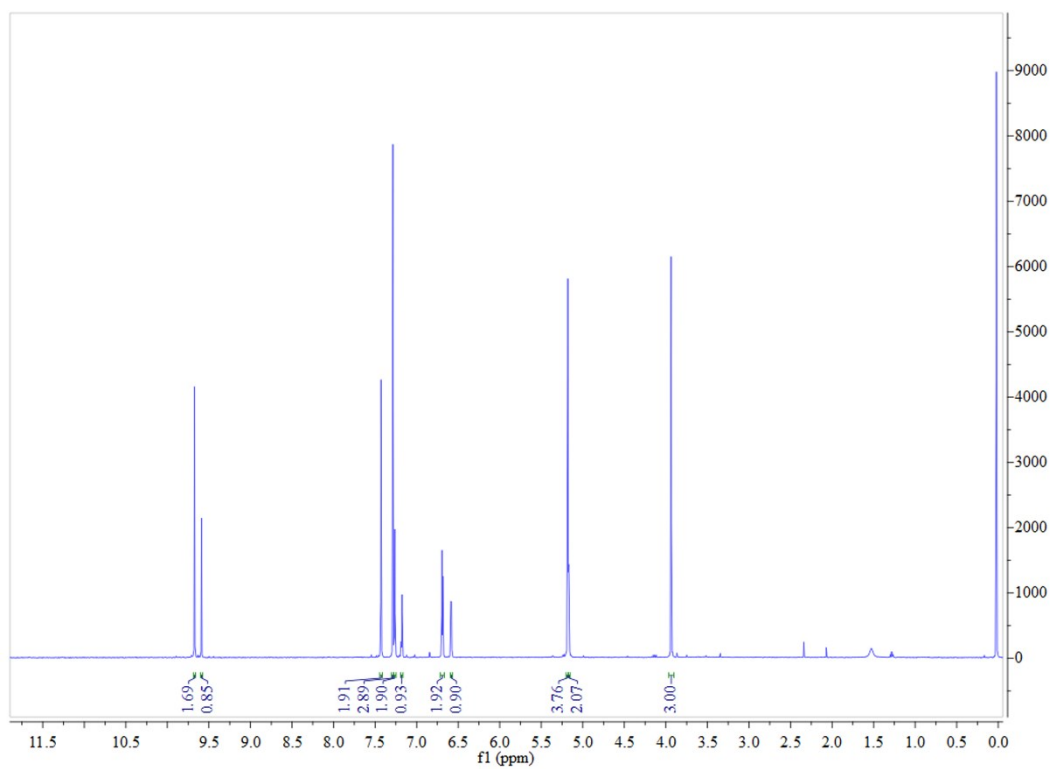

Figure S8. <sup>1</sup>H NMR of compound **3**

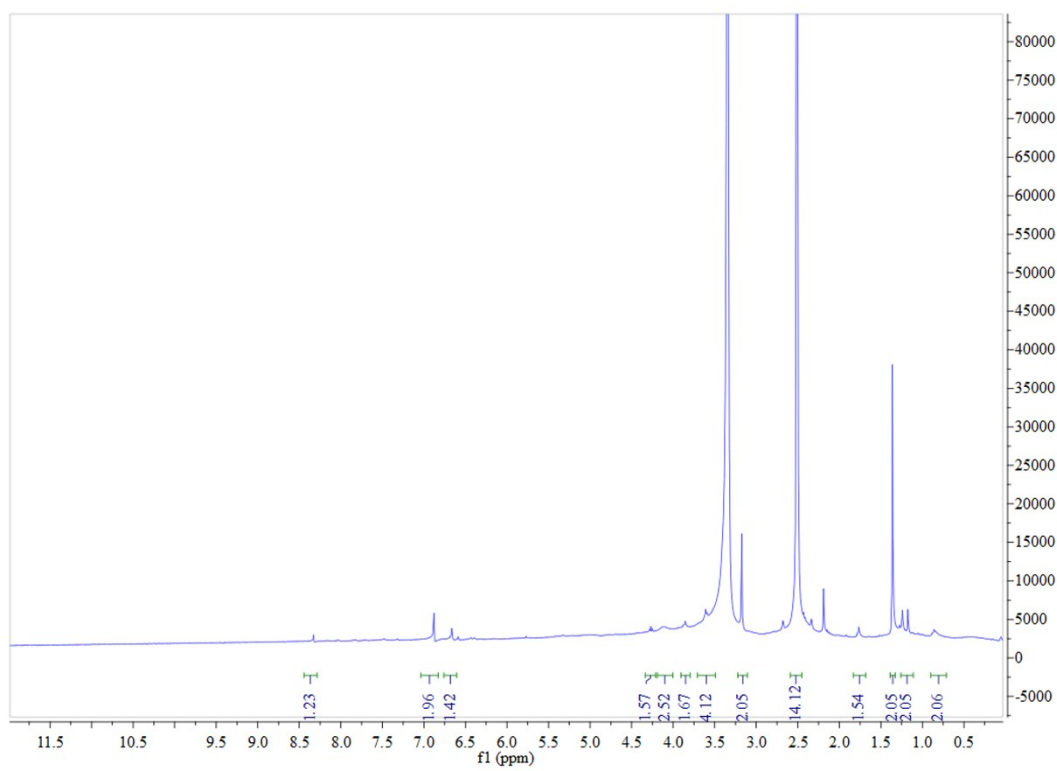

Figure S9. <sup>1</sup>H NMR of compound **4**
